# Supplementary material
Source: ML conference proceedings conference paper supplement (https://proceedings.mlr.press/v176/jiang22a.html)
Supplement: Supplementary file [file jiang22a-supp.pdf]

## Appendix A. Text to Image Generation

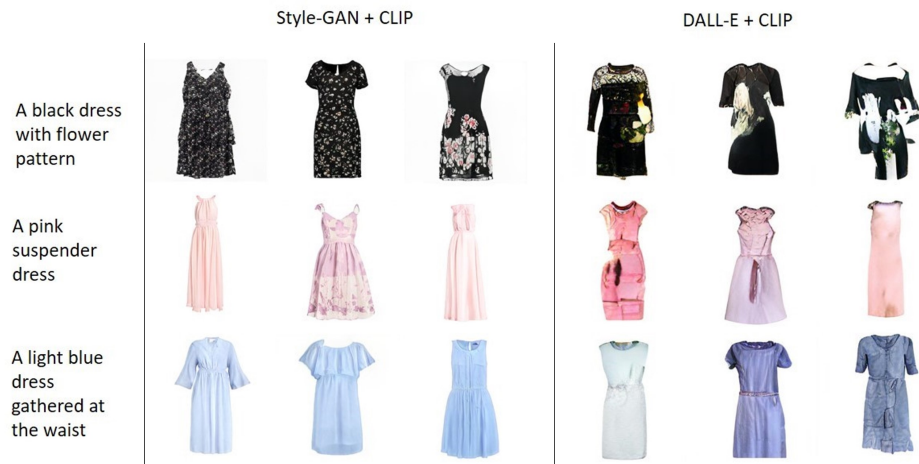

Figure 1: Examples of text-to-image generation. For each text prompt on the left, the first 3 images are found using StyleGAN+CLIP and the second 3 images are generated by DALL-E.

## Appendix B. Image Embedding in Latent Space

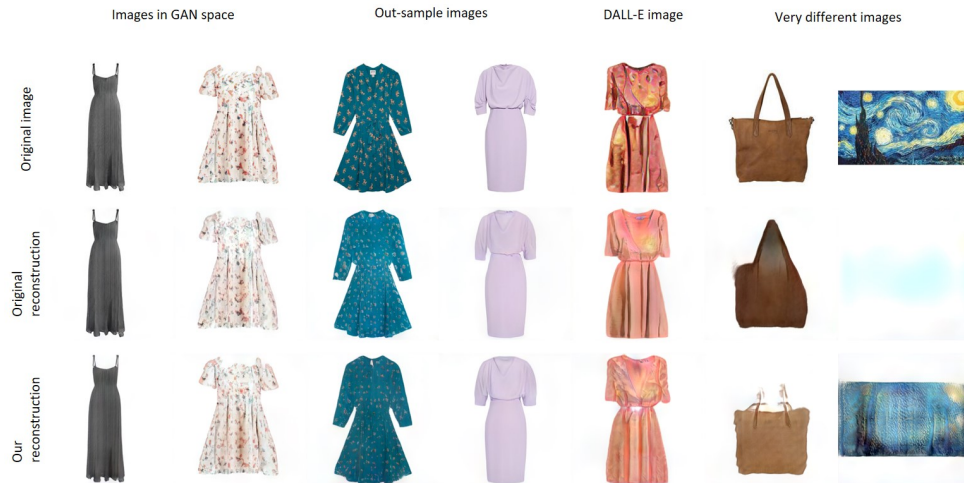

Figure 2: Example results of image embedding. The images in first row are the input images. The second row shows images found without using the pixel-level loss, and the third row shows images found using the pixel-level loss.

## Appendix C. Examples of Meaningful Principal Components Found in the Latent Space

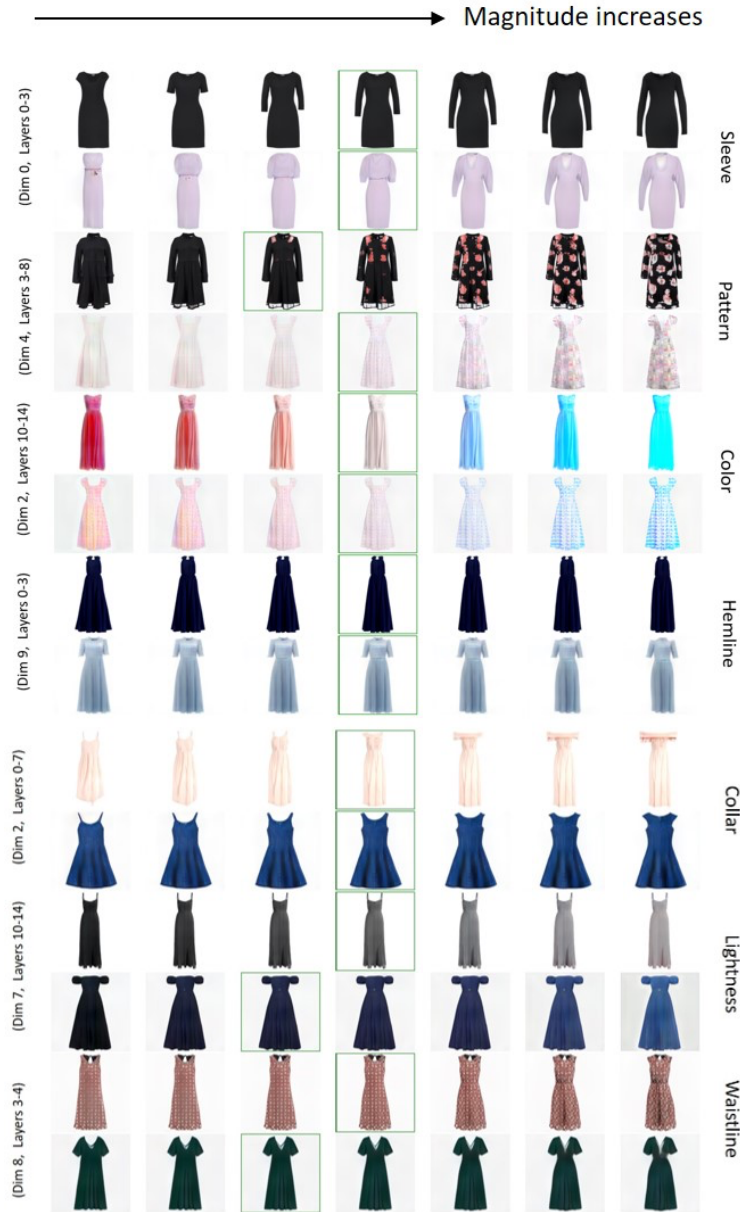

Figure 3: Examples of meaningful principle components  $p$  found in the latent space by PCA. (Dim  $k$ , Layers  $a$ - $b$ ) represents the  $k$ 'th principle component applied in layers  $a$  to  $b$  in the 14-layer synthesis network. The images in green boxes are the original images with 0 magnitude. For each  $p$ , we show the result of two images, one in-sample and another out-of-sample.
